# Supplementary material for: Efficacy of Cathelicidin-Mimetic Antimicrobial Peptoids against Staphylococcus aureus
Source: PubMed Central journal article supplement (PMC9241801; doi:10.1128/spectrum.00534-22), 2022-04-25
Supplement: spectrum.00534-22-s001.pdf [file spectrum.00534-22-s001.pdf]

1 **Supplementary Material**

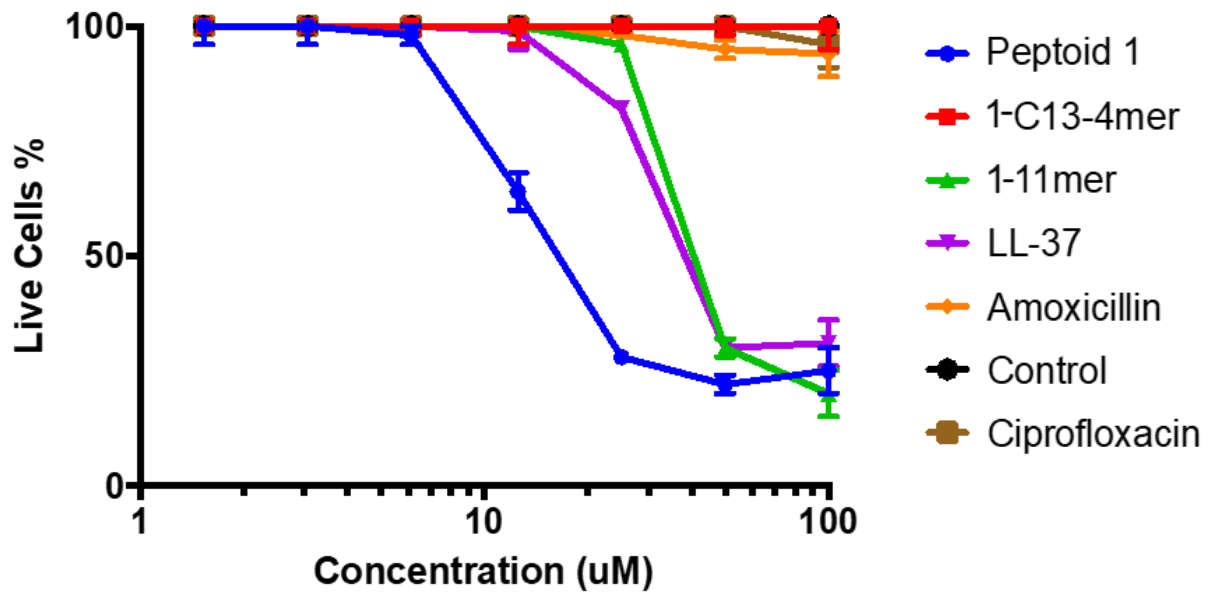

2

3 **Figure S.1:** Cytotoxicity of peptoids against 3T3 cell lines in culture. The median lethal  
4 dose (LD<sub>50</sub>) was determined as the concentration at which 50% of the cells were killed.  
5 All data points are represented as means using three replicates. Error bars are  
6 represented as ± standard deviation (SD).

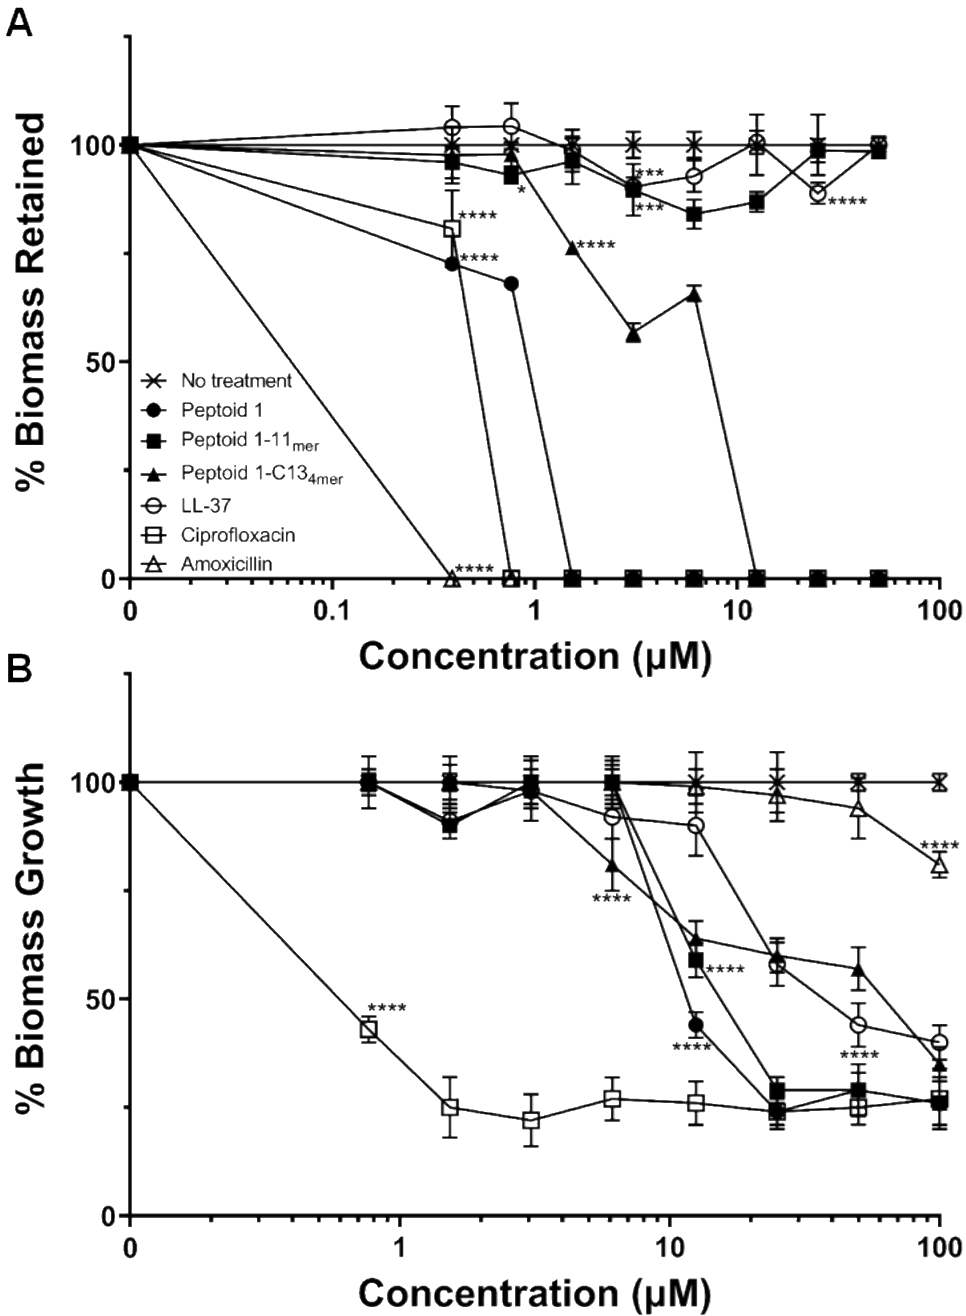

7 **Figure S.2:** Measurement of planktonic *Staphylococcus aureus* (a) Xen29 and (b) Xen36  
 8 biofilm formation in LB for 24 hours in the presence of antimicrobial peptides (AMPs) and  
 9 conventional antibiotics. Prevention of biofilm formation is plotted as percent biomass  
 10 analyzed by crystal violet (CV) staining assay. (a) Peptoid 1, ciprofloxacin, and amoxicillin  
 11 were all significant starting at all concentrations tested. Peptoid 1-C13<sub>4mer</sub> was significant

12 compared to the no treatment control starting 1.56  $\mu\text{M}$  and up while Peptoid 1-11<sub>mer</sub> was  
13 significant at 0.78  $\mu\text{M}$  and from 3.125  $\mu\text{M}$  to 12.5  $\mu\text{M}$ . LL-37 showed significance from  
14 3.125  $\mu\text{M}$  to 6.25  $\mu\text{M}$  and once again at 25  $\mu\text{M}$ . **(b)** For Xen36, ciprofloxacin showed a  
15 significant decrease from the no treatment control for all tested concentrations. Peptoid  
16 1-C13<sub>4mer</sub> showed significance from 6.25  $\mu\text{M}$  onward, while Peptoid 1 and Peptoid 1-11<sub>mer</sub>  
17 showed significance starting at 12.5  $\mu\text{M}$ . LL-37 showed significance from 25  $\mu\text{M}$  onward,  
18 while amoxicillin only showed significance at 100  $\mu\text{M}$ . All data points are represented as  
19 means using three replicates. Error bars are represented as  $\pm$  standard deviation (SD).  
20 Statistics were performed using 2-way ANOVA, comparing each antimicrobial to the no  
21 treatment control. P values are:  $< 0.0001 = ****$ , between 0.0001 and 0.001 =  $***$ , between  
22 0.001 and 0.01 =  $**$ , and between 0.01 and 0.05 =  $*$ .

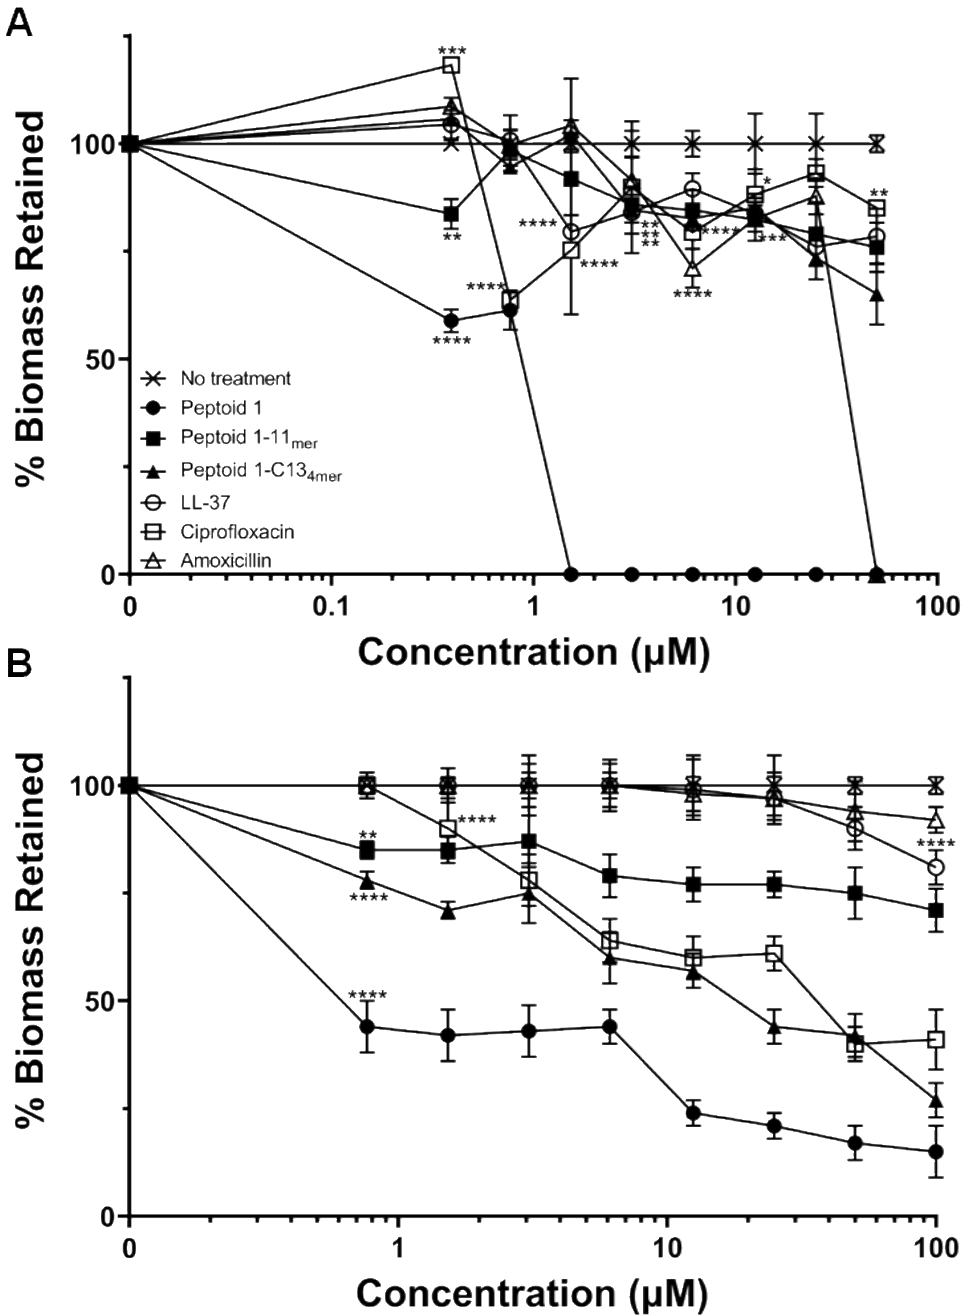

23 **Figure S.3:** Measurement of (a) Xen29 and (b) Xen36 biofilm detachment in LB for 24  
 24 hours by antimicrobial peptides (AMPs) and conventional antibiotics. Detachment is  
 25 plotted as percent biomass of established biofilms after treatment with antimicrobials. (a)  
 26 Peptoid 1 showed a significant decrease for all tested concentrations compared to the no  
 27 treatment control. Peptoid 1-11<sub>mer</sub> showed a significant decrease at 0.39  $\mu\text{M}$ , however,

28 didn't show significance again until 3.125  $\mu\text{M}$ , where both Peptoid 1-C13<sub>4mer</sub> and it  
29 showed significance onwards. LL-37 showed significance initially from 1.56  $\mu\text{M}$  to 3.125  
30  $\mu\text{M}$  and once again from 12.5  $\mu\text{M}$  onward. Ciprofloxacin showed an initial increase  
31 compared to the no treatment control at 0.39  $\mu\text{M}$ , however, decreased at all other  
32 concentrations except for 3.125  $\mu\text{M}$  and 25  $\mu\text{M}$ , while amoxicillin showed significance  
33 from 6.125  $\mu\text{M}$  onward. **(b)** For Xen 36, Peptoid 1, Peptoid 1-C13<sub>4mer</sub>, and Peptoid 1-11<sub>mer</sub>  
34 all showed a significant decrease when compared to the no treatment control at all tested  
35 concentrations. Ciprofloxacin showed a significant decrease in biomass retained at  
36 concentrations above 1.56  $\mu\text{M}$ . Amoxicillin showed no significant decrease at all tested  
37 concentrations, while LL-37 only showed significance at 100  $\mu\text{M}$ . All data points are  
38 represented as means using three replicates. Error bars are represented as  $\pm$  standard  
39 deviation (SD). Statistics were performed using 2-way ANOVA, comparing each  
40 antimicrobial to the no treatment control. P values are:  $< 0.0001 = ****$ , between 0.0001  
41 and 0.001 =  $***$ , between 0.001 and 0.01 =  $**$ , and between 0.01 and 0.05 =  $*$ .

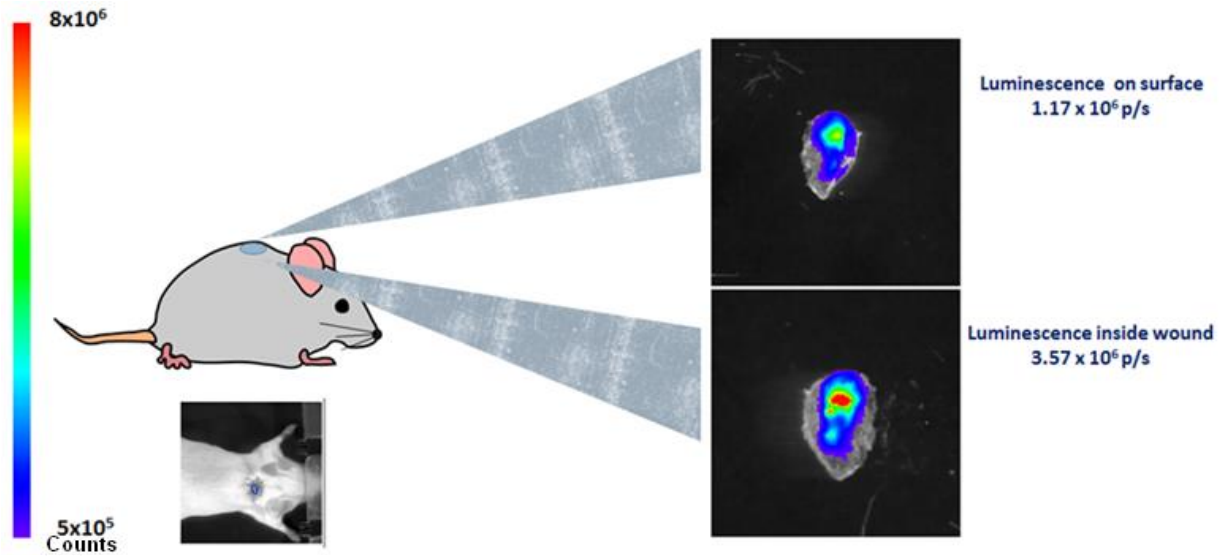

42

43 **Figure S.4:** Bioluminescence of excised wound. Wounds were excised out, imaged from  
 44 control animals in **Figure 6**, and imaged from both top and bottom. (a) Top (dorsal) side  
 45 image with total bioluminescence of  $1.17 \times 10^6$  photons per second (p/s). (b) Bottom  
 46 (ventral) side image with total bioluminescence of  $3.57 \times 10^6$  p/s.

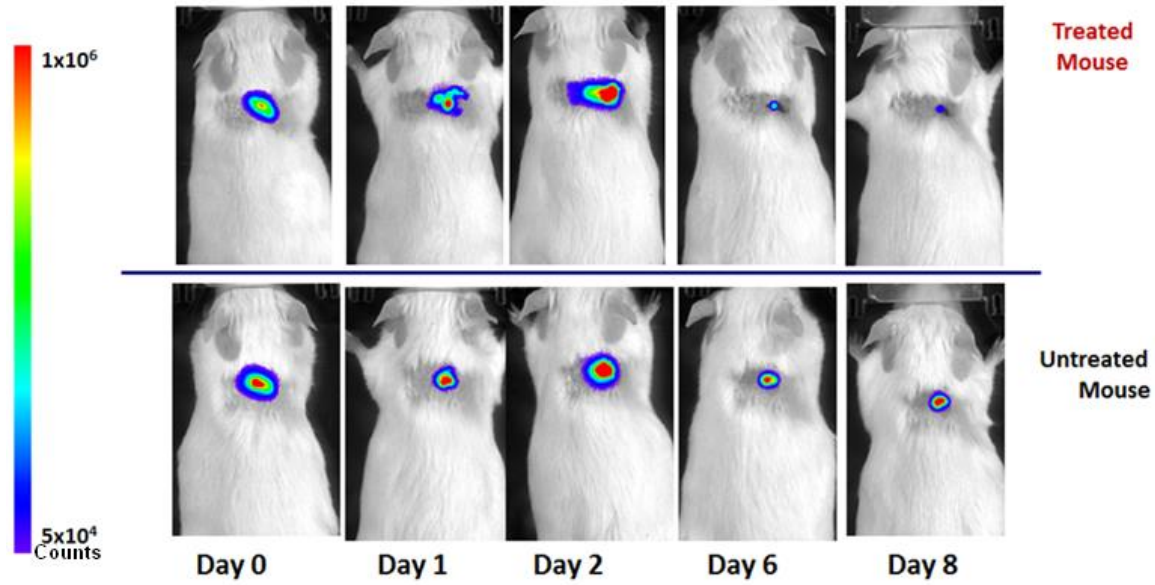

47

48 **Figure S.5:** *In vivo* bioluminescence imaging. Bioluminescent *Staphylococcus aureus*,  
 49 Xen36, was injected into the incision wounds. Wounds on mice treated with 800  $\mu$ M  
 50 Peptoid 1 in water, showed negligible bioluminescence for eight days (mice above line).  
 51 Control mice treated with water (below line) still showed bioluminescence by Day eight.

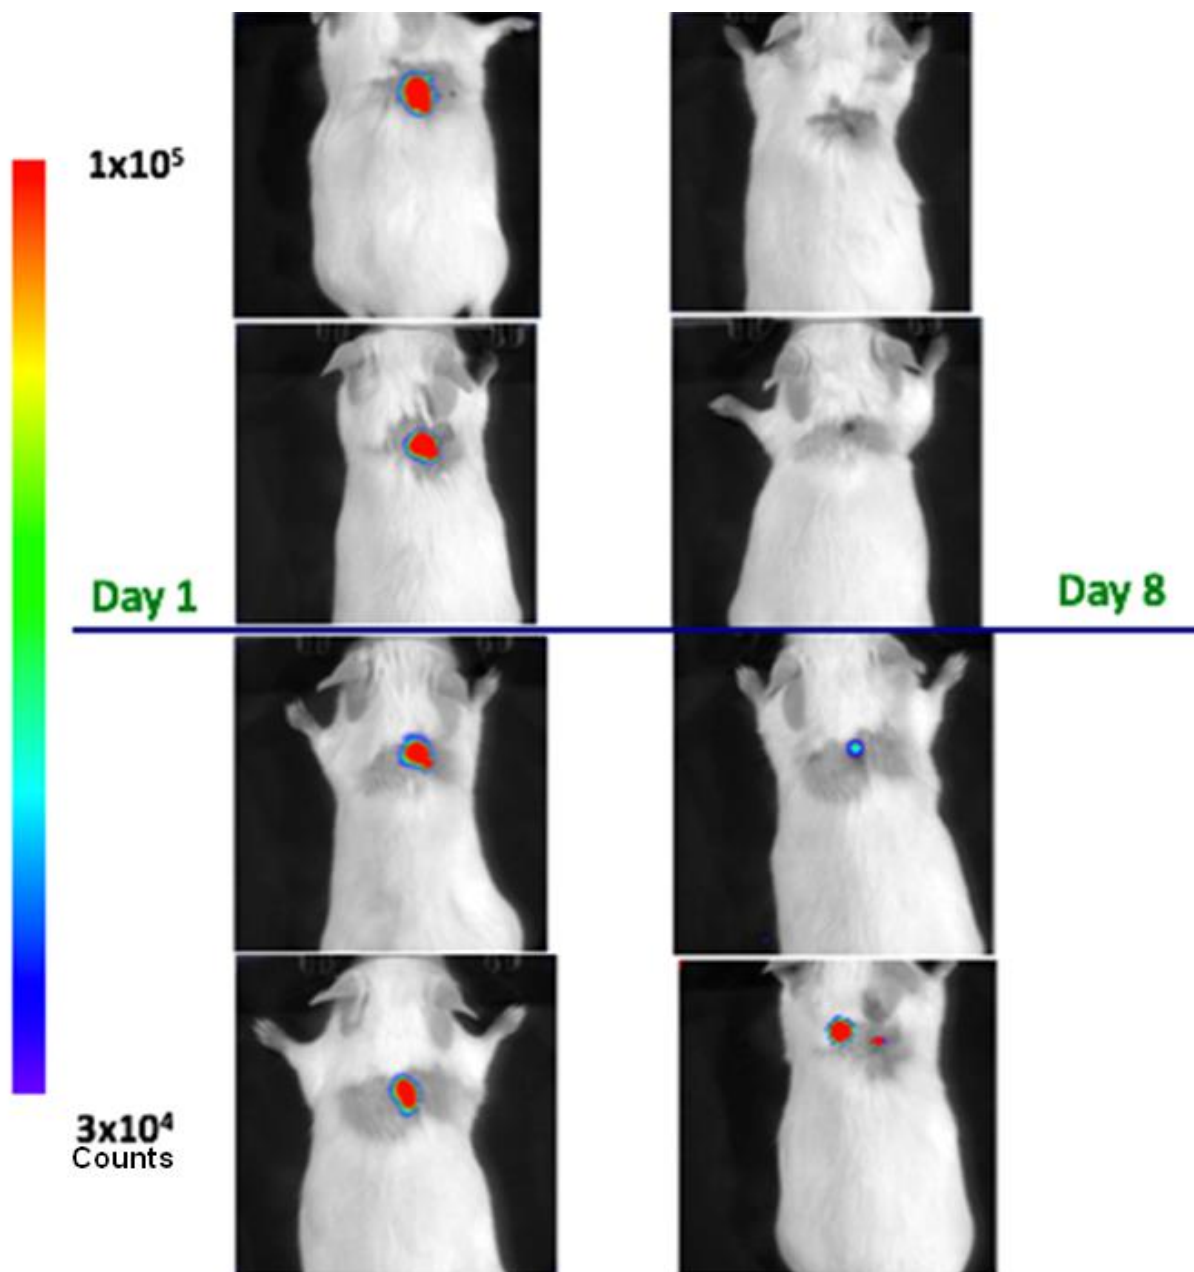

52

53 **Figure S.6:** *In vivo* bioluminescence imaging. Bioluminescent *Staphylococcus aureus*,  
 54 Xen36, was injected into the incision wounds. Wounds on mice treated with 800  $\mu$ M  
 55 Peptoid 1-C13<sub>4mer</sub> in water (**Above Line**), showed negligible bioluminescence for eight  
 56 days. Control mice (**Below Line**) treated with water buffer showed bioluminescence at  
 57 eight days.



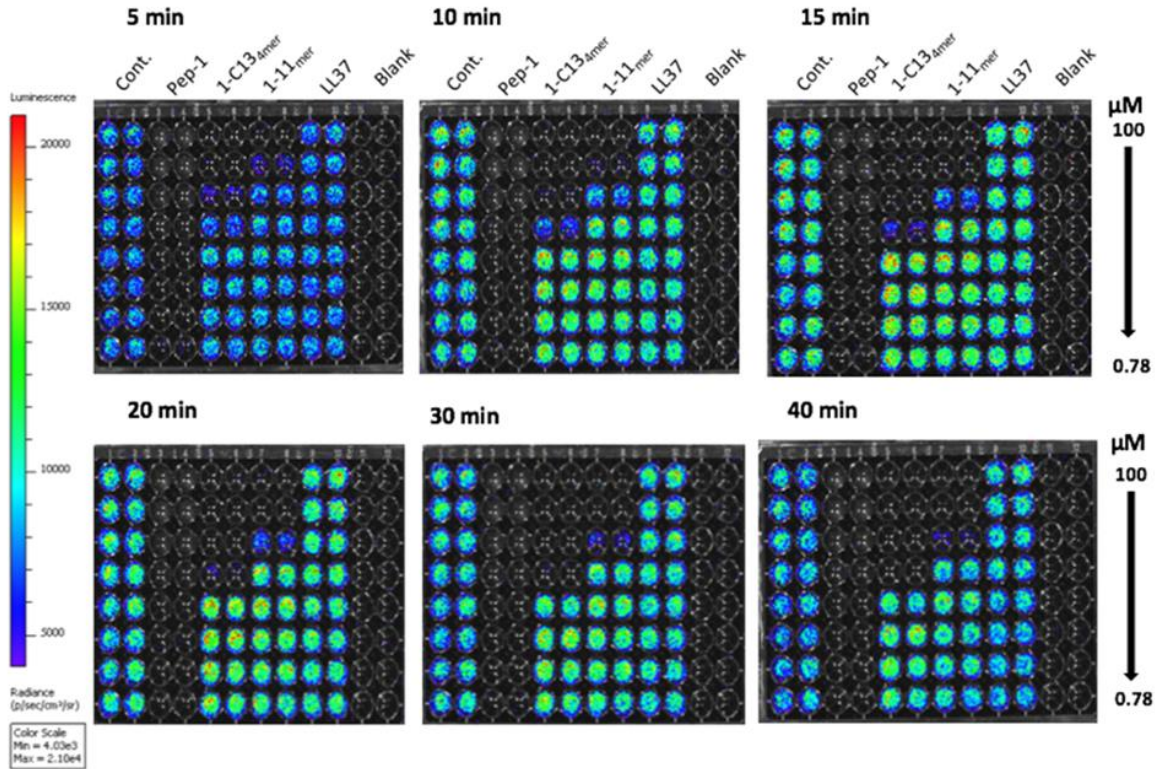

58

59 **Figure S.7:** An example bioluminescent assay after inoculation with Xen29 and  
 60 incubation for 5-40 min at 35 °C. Growth in column one (Just Cells) shows normal growth  
 61 of the bacterial inoculum. Column eleven and twelve (Media) show no growth as it does  
 62 not contain bacteria and demonstrates that the media was properly sterilized and handled  
 63 aseptically. Wells in columns three and four show the inhibitory activity of Peptoid 1,  
 64 Peptoid 1-C13<sub>4mer</sub> in columns five and six, and so on.
